# Supplementary material for: Female perspectives on male involvement in a human-papillomavirus-based cervical cancer-screening program in western Kenya
Source: PubMed Central journal article supplement (PMC6688365; doi:10.1186/s12905-019-0804-4), 2019-08-08

## Cluster Randomized Trial of Community-based Cervical Cancer Screening using HPV Testing

### Female Client Open Interview: Component 2 – Community-based Screening

|                                                                                                                                                                                                                                                                                                                                                                                                                                                                                                                                                                                                                                                                |                                                                                                                                                                                                                                                                                                                                                                                                                                                                                                                                                                                                                                                                                                                                                                                                                                                                                                                                                                                                                                                                                                                                                                                                                                                            |
|----------------------------------------------------------------------------------------------------------------------------------------------------------------------------------------------------------------------------------------------------------------------------------------------------------------------------------------------------------------------------------------------------------------------------------------------------------------------------------------------------------------------------------------------------------------------------------------------------------------------------------------------------------------|------------------------------------------------------------------------------------------------------------------------------------------------------------------------------------------------------------------------------------------------------------------------------------------------------------------------------------------------------------------------------------------------------------------------------------------------------------------------------------------------------------------------------------------------------------------------------------------------------------------------------------------------------------------------------------------------------------------------------------------------------------------------------------------------------------------------------------------------------------------------------------------------------------------------------------------------------------------------------------------------------------------------------------------------------------------------------------------------------------------------------------------------------------------------------------------------------------------------------------------------------------|
| <p><b>Participant ID:</b> <input style="width: 40px; height: 20px;" type="text"/> <input style="width: 40px; height: 20px;" type="text"/> <input style="width: 40px; height: 20px;" type="text"/> <input style="width: 40px; height: 20px;" type="text"/></p> <p><b>Site ID:</b> <input style="width: 40px; height: 20px;" type="text"/> <input style="width: 40px; height: 20px;" type="text"/></p> <p><b>Community screening site:</b> _____</p> <p><b>Interviewer Initials:</b> <input style="width: 40px; height: 20px;" type="text"/> <input style="width: 40px; height: 20px;" type="text"/> <input style="width: 40px; height: 20px;" type="text"/></p> | <p><b>Today's Date:</b></p> <p style="text-align: center;">Day                      Month                      Year</p> <p style="text-align: center;"><input style="width: 40px; height: 20px;" type="text"/> <input style="width: 40px; height: 20px;" type="text"/>      <input style="width: 40px; height: 20px;" type="text"/> <input style="width: 40px; height: 20px;" type="text"/>      <input style="width: 40px; height: 20px;" type="text"/> <input style="width: 40px; height: 20px;" type="text"/></p> <p><b>Time Interview Started:</b>                      <b>Time Interview Ended:</b></p> <p style="text-align: center;">Hour                      Minutes                      Hour                      Minutes</p> <p style="text-align: center;"><input style="width: 40px; height: 20px;" type="text"/> <input style="width: 40px; height: 20px;" type="text"/>      <input style="width: 40px; height: 20px;" type="text"/> <input style="width: 40px; height: 20px;" type="text"/>      <input style="width: 40px; height: 20px;" type="text"/> <input style="width: 40px; height: 20px;" type="text"/>      <input style="width: 40px; height: 20px;" type="text"/> <input style="width: 40px; height: 20px;" type="text"/></p> |
|----------------------------------------------------------------------------------------------------------------------------------------------------------------------------------------------------------------------------------------------------------------------------------------------------------------------------------------------------------------------------------------------------------------------------------------------------------------------------------------------------------------------------------------------------------------------------------------------------------------------------------------------------------------|------------------------------------------------------------------------------------------------------------------------------------------------------------------------------------------------------------------------------------------------------------------------------------------------------------------------------------------------------------------------------------------------------------------------------------------------------------------------------------------------------------------------------------------------------------------------------------------------------------------------------------------------------------------------------------------------------------------------------------------------------------------------------------------------------------------------------------------------------------------------------------------------------------------------------------------------------------------------------------------------------------------------------------------------------------------------------------------------------------------------------------------------------------------------------------------------------------------------------------------------------------|

|                                                                       |                          |                          |
|-----------------------------------------------------------------------|--------------------------|--------------------------|
|                                                                       | Yes                      | No                       |
| <b>Has the consent form been reviewed with the interviewee?</b>       | <input type="checkbox"/> | <input type="checkbox"/> |
| <b>Has the consent form been signed and dated by the interviewee?</b> | <input type="checkbox"/> | <input type="checkbox"/> |

**INTERVIEWER SAY:** *I want to thank you for taking the time to meet with me today. My name is \_\_\_\_\_ and I would like to talk to you about your experience participating in the HPV testing program. First, I will ask you a series of questions that require short answers. The second part of the interview will be more like a conversation where I will ask for your thoughts and opinions about completing the educational session. As we discussed in the consent process, I'd like to tape record your answers during the interview if that is okay with you.*

### Section 1: Demographic Characteristics

| No.                                     | Questions                                                | Answer Choices                                                                                                                                                                                                                                                                                                                                                                                                                                                                                                                                                                                                                                                                                                                                                                                                                                                                                                                                                                              |                                         |                                       |                                         |                                       |                                         |                                       |                                         |                                       |                                         |                                        |                                         |                                           |                                         |                                            |                                         |                                     |
|-----------------------------------------|----------------------------------------------------------|---------------------------------------------------------------------------------------------------------------------------------------------------------------------------------------------------------------------------------------------------------------------------------------------------------------------------------------------------------------------------------------------------------------------------------------------------------------------------------------------------------------------------------------------------------------------------------------------------------------------------------------------------------------------------------------------------------------------------------------------------------------------------------------------------------------------------------------------------------------------------------------------------------------------------------------------------------------------------------------------|-----------------------------------------|---------------------------------------|-----------------------------------------|---------------------------------------|-----------------------------------------|---------------------------------------|-----------------------------------------|---------------------------------------|-----------------------------------------|----------------------------------------|-----------------------------------------|-------------------------------------------|-----------------------------------------|--------------------------------------------|-----------------------------------------|-------------------------------------|
| 101                                     | How old are you?                                         | Age in years: <input style="width: 40px; height: 20px;" type="text"/> <input style="width: 40px; height: 20px;" type="text"/>                                                                                                                                                                                                                                                                                                                                                                                                                                                                                                                                                                                                                                                                                                                                                                                                                                                               |                                         |                                       |                                         |                                       |                                         |                                       |                                         |                                       |                                         |                                        |                                         |                                           |                                         |                                            |                                         |                                     |
| 102                                     | What is the highest level of education you've completed? | <table style="width: 100%; border: none;"> <tr> <td style="width: 50%;">Standard 1 ... <input type="checkbox"/></td> <td style="width: 50%;">Form 1 ..... <input type="checkbox"/></td> </tr> <tr> <td>Standard 2 ... <input type="checkbox"/></td> <td>Form 2 ..... <input type="checkbox"/></td> </tr> <tr> <td>Standard 3 ... <input type="checkbox"/></td> <td>Form 3 ..... <input type="checkbox"/></td> </tr> <tr> <td>Standard 4 ... <input type="checkbox"/></td> <td>Form 4 ..... <input type="checkbox"/></td> </tr> <tr> <td>Standard 5 ... <input type="checkbox"/></td> <td>College ..... <input type="checkbox"/></td> </tr> <tr> <td>Standard 6 ... <input type="checkbox"/></td> <td>University ..... <input type="checkbox"/></td> </tr> <tr> <td>Standard 7 ... <input type="checkbox"/></td> <td>Beyond University <input type="checkbox"/></td> </tr> <tr> <td>Standard 8 ... <input type="checkbox"/></td> <td>None ..... <input type="checkbox"/></td> </tr> </table> | Standard 1 ... <input type="checkbox"/> | Form 1 ..... <input type="checkbox"/> | Standard 2 ... <input type="checkbox"/> | Form 2 ..... <input type="checkbox"/> | Standard 3 ... <input type="checkbox"/> | Form 3 ..... <input type="checkbox"/> | Standard 4 ... <input type="checkbox"/> | Form 4 ..... <input type="checkbox"/> | Standard 5 ... <input type="checkbox"/> | College ..... <input type="checkbox"/> | Standard 6 ... <input type="checkbox"/> | University ..... <input type="checkbox"/> | Standard 7 ... <input type="checkbox"/> | Beyond University <input type="checkbox"/> | Standard 8 ... <input type="checkbox"/> | None ..... <input type="checkbox"/> |
| Standard 1 ... <input type="checkbox"/> | Form 1 ..... <input type="checkbox"/>                    |                                                                                                                                                                                                                                                                                                                                                                                                                                                                                                                                                                                                                                                                                                                                                                                                                                                                                                                                                                                             |                                         |                                       |                                         |                                       |                                         |                                       |                                         |                                       |                                         |                                        |                                         |                                           |                                         |                                            |                                         |                                     |
| Standard 2 ... <input type="checkbox"/> | Form 2 ..... <input type="checkbox"/>                    |                                                                                                                                                                                                                                                                                                                                                                                                                                                                                                                                                                                                                                                                                                                                                                                                                                                                                                                                                                                             |                                         |                                       |                                         |                                       |                                         |                                       |                                         |                                       |                                         |                                        |                                         |                                           |                                         |                                            |                                         |                                     |
| Standard 3 ... <input type="checkbox"/> | Form 3 ..... <input type="checkbox"/>                    |                                                                                                                                                                                                                                                                                                                                                                                                                                                                                                                                                                                                                                                                                                                                                                                                                                                                                                                                                                                             |                                         |                                       |                                         |                                       |                                         |                                       |                                         |                                       |                                         |                                        |                                         |                                           |                                         |                                            |                                         |                                     |
| Standard 4 ... <input type="checkbox"/> | Form 4 ..... <input type="checkbox"/>                    |                                                                                                                                                                                                                                                                                                                                                                                                                                                                                                                                                                                                                                                                                                                                                                                                                                                                                                                                                                                             |                                         |                                       |                                         |                                       |                                         |                                       |                                         |                                       |                                         |                                        |                                         |                                           |                                         |                                            |                                         |                                     |
| Standard 5 ... <input type="checkbox"/> | College ..... <input type="checkbox"/>                   |                                                                                                                                                                                                                                                                                                                                                                                                                                                                                                                                                                                                                                                                                                                                                                                                                                                                                                                                                                                             |                                         |                                       |                                         |                                       |                                         |                                       |                                         |                                       |                                         |                                        |                                         |                                           |                                         |                                            |                                         |                                     |
| Standard 6 ... <input type="checkbox"/> | University ..... <input type="checkbox"/>                |                                                                                                                                                                                                                                                                                                                                                                                                                                                                                                                                                                                                                                                                                                                                                                                                                                                                                                                                                                                             |                                         |                                       |                                         |                                       |                                         |                                       |                                         |                                       |                                         |                                        |                                         |                                           |                                         |                                            |                                         |                                     |
| Standard 7 ... <input type="checkbox"/> | Beyond University <input type="checkbox"/>               |                                                                                                                                                                                                                                                                                                                                                                                                                                                                                                                                                                                                                                                                                                                                                                                                                                                                                                                                                                                             |                                         |                                       |                                         |                                       |                                         |                                       |                                         |                                       |                                         |                                        |                                         |                                           |                                         |                                            |                                         |                                     |
| Standard 8 ... <input type="checkbox"/> | None ..... <input type="checkbox"/>                      |                                                                                                                                                                                                                                                                                                                                                                                                                                                                                                                                                                                                                                                                                                                                                                                                                                                                                                                                                                                             |                                         |                                       |                                         |                                       |                                         |                                       |                                         |                                       |                                         |                                        |                                         |                                           |                                         |                                            |                                         |                                     |

|     |                                                                                                 |                                                                                                                                                                                                                                                                                                                                                                                                                                      |
|-----|-------------------------------------------------------------------------------------------------|--------------------------------------------------------------------------------------------------------------------------------------------------------------------------------------------------------------------------------------------------------------------------------------------------------------------------------------------------------------------------------------------------------------------------------------|
| 103 | What is your occupation?                                                                        | Professional/technical/managerial ..... <input type="checkbox"/><br>Domestic service ..... <input type="checkbox"/><br>Agriculture and Fishing ..... <input type="checkbox"/><br>Clerical ..... <input type="checkbox"/><br>Sales and services ..... <input type="checkbox"/><br>Skilled manual ..... <input type="checkbox"/><br>Unskilled manual ..... <input type="checkbox"/><br>None / Housewife ..... <input type="checkbox"/> |
| 104 | How far is your home from the village center?                                                   | Distance in kilometres: <input type="text"/> <input type="text"/>                                                                                                                                                                                                                                                                                                                                                                    |
| 105 | How far is your home from the district hospital?                                                | Distance in kilometres: <input type="text"/> <input type="text"/>                                                                                                                                                                                                                                                                                                                                                                    |
| 106 | What is your relationship status?                                                               | Single ..... <input type="checkbox"/><br>Married/Partnered ..... <input type="checkbox"/><br>Separated ..... <input type="checkbox"/><br>Widowed/Divorced ..... <input type="checkbox"/>                                                                                                                                                                                                                                             |
| 107 | How many children do you currently have?                                                        | Number of children: <input type="text"/> <input type="text"/>                                                                                                                                                                                                                                                                                                                                                                        |
| 108 | Are you pregnant?                                                                               | Yes ..... <input type="checkbox"/><br>No ..... <input type="checkbox"/>                                                                                                                                                                                                                                                                                                                                                              |
| 109 | If pregnant, what is your estimated due date?<br><i>If not pregnant, skip to question #110.</i> | Day                      Month                      Year<br><input type="text"/> <input type="text"/> <input type="text"/> <input type="text"/> <input type="text"/> <input type="text"/>                                                                                                                                                                                                                                            |

**Section 2: Quantitative Questions about the Community-based Screening Component**

| No. | Question                                                                              | Answer Choices                                                          |
|-----|---------------------------------------------------------------------------------------|-------------------------------------------------------------------------|
| 201 | Was the community site easy to travel to for HPV self-testing?                        | Yes ..... <input type="checkbox"/><br>No ..... <input type="checkbox"/> |
| 202 | How far did you travel from your home to complete the HPV self-testing?               | Distance in kilometres: <input type="text"/> <input type="text"/>       |
| 203 | Did you find the place where HPV self-testing was conducted to have adequate privacy? | Yes ..... <input type="checkbox"/><br>No ..... <input type="checkbox"/> |

|     |                                                                                                                                    |                                                                                                                                                                                                                                                                                                      |
|-----|------------------------------------------------------------------------------------------------------------------------------------|------------------------------------------------------------------------------------------------------------------------------------------------------------------------------------------------------------------------------------------------------------------------------------------------------|
| 204 | Were you able to complete the HPV self-testing?                                                                                    | Yes ..... <input type="checkbox"/><br>No ..... <input type="checkbox"/>                                                                                                                                                                                                                              |
| 205 | If you were unable to complete the HPV self-testing, why? Check all that apply.<br><br><i>If completed, skip to question #203.</i> | Menses ..... <input type="checkbox"/><br>Did not understand instructions ..... <input type="checkbox"/><br>Did not have adequate privacy ..... <input type="checkbox"/><br>Too uncomfortable/painful ..... <input type="checkbox"/><br>Not enough time ..... <input type="checkbox"/><br>Other _____ |
| 206 | Were the self-testing instructions clear?                                                                                          | Yes ..... <input type="checkbox"/><br>No ..... <input type="checkbox"/>                                                                                                                                                                                                                              |
| 207 | Was someone available to answer your questions about self-testing?                                                                 | Yes ..... <input type="checkbox"/><br>No ..... <input type="checkbox"/>                                                                                                                                                                                                                              |
| 208 | Was the self-testing uncomfortable?                                                                                                | Yes ..... <input type="checkbox"/><br>No ..... <input type="checkbox"/>                                                                                                                                                                                                                              |
| 209 | Was the self-testing painful?                                                                                                      | Yes ..... <input type="checkbox"/><br>No ..... <input type="checkbox"/>                                                                                                                                                                                                                              |
| 210 | Would you test via self-collection again?                                                                                          | Yes ..... <input type="checkbox"/><br>No ..... <input type="checkbox"/>                                                                                                                                                                                                                              |
| 211 | Would you recommend HPV testing to a friend?                                                                                       | Yes ..... <input type="checkbox"/><br>No ..... <input type="checkbox"/>                                                                                                                                                                                                                              |
| 212 | At the end of self-testing, did you receive information on how to get your results?                                                | Yes ..... <input type="checkbox"/><br>No ..... <input type="checkbox"/>                                                                                                                                                                                                                              |
| 213 | How do you prefer to receive your test result?                                                                                     | SMS ..... <input type="checkbox"/><br>Will return to my clinic ..... <input type="checkbox"/>                                                                                                                                                                                                        |

**Section 3: Open-ended Questions**

**INTERVIEWER SAY:** *As I have mentioned, I will now ask you some questions about your thoughts and opinions about HPV self-testing and cervical cancer prevention. There are no right or wrong answers to these questions – your views will be very helpful to us as we develop cervical cancer prevention interventions in the future.*

| No. | Question                                           |
|-----|----------------------------------------------------|
| 301 | What did you like most about the HPV self-testing? |

|     |                                                                                                                                                                        |
|-----|------------------------------------------------------------------------------------------------------------------------------------------------------------------------|
| 302 | What did you not like about the HPV self-testing?                                                                                                                      |
| 303 | Do you think HPV self-testing will be acceptable to women in your community? Why or why not?                                                                           |
| 304 | Do you feel that most women will be able to complete specimen collection on their first visit? Why or why not?                                                         |
| 305 | What can be done to facilitate the completion of HPV self-testing?<br><br><i>Probe: Are there ways to make self-testing more acceptable or comfortable for women?</i>  |
| 306 | Are there ways that the self-testing instructions can be improved (i.e., made easier to understand)?                                                                   |
| 307 | Are tents with separate rooms for screening preferable to using existing spaces, such as community centers or churches? Why or why not?                                |
| 308 | Do you feel that women would prefer getting cervical cancer screening at community sites or at a local clinic? Why?                                                    |
| 309 | Do you feel like it is important for a clinician to be part of cervical cancer screening? Why or why not?                                                              |
| 310 | Who decided whether you get screened for cervical cancer?                                                                                                              |
| 311 | What are some factors that contributed to your decision to get screening?<br><br><i>Probes: Distance to clinic, comfort with screening test, male partner approval</i> |
| 312 | What could be done to encourage women to get screened for cervical cancer?                                                                                             |
| 313 | Do you have any other thoughts about the HPV self-testing or cervical cancer prevention that we haven't covered?                                                       |

**INTERVIEWER:** *Thank respondent for her time and assistance.*

*Return to front page and enter ending time.*

**Interviewer notes or observations:**



Supplement: 12905_2019_804_MOESM3_ESM.pdf [file 12905_2019_804_MOESM3_ESM.pdf]
