# Supplementary material for: Female perspectives on male involvement in a human-papillomavirus-based cervical cancer-screening program in western Kenya
Source: PubMed Central journal article supplement (PMC6688365; doi:10.1186/s12905-019-0804-4), 2019-08-08
Supplement: 12905_2019_804_MOESM1_ESM.pdf [file 12905_2019_804_MOESM1_ESM.pdf]

## Cluster Randomized Trial of Community-based Cervical Cancer Screening using HPV Testing

### Female Client Open Interview: Component 1 - HPV and Cervical Cancer Outreach and Education

|                                                                                                                                                                                                                                                                                                                                                                                                                                                                                                                                                                                                                                                                                                                                                                                                                         |                                                                                                                                                                                                                                                                                                                                                                                                                                                                                                                                                                                                                                                                                                                                                                                                                                                                                                                                                                                                                                                                                                                                                                                                                                                            |
|-------------------------------------------------------------------------------------------------------------------------------------------------------------------------------------------------------------------------------------------------------------------------------------------------------------------------------------------------------------------------------------------------------------------------------------------------------------------------------------------------------------------------------------------------------------------------------------------------------------------------------------------------------------------------------------------------------------------------------------------------------------------------------------------------------------------------|------------------------------------------------------------------------------------------------------------------------------------------------------------------------------------------------------------------------------------------------------------------------------------------------------------------------------------------------------------------------------------------------------------------------------------------------------------------------------------------------------------------------------------------------------------------------------------------------------------------------------------------------------------------------------------------------------------------------------------------------------------------------------------------------------------------------------------------------------------------------------------------------------------------------------------------------------------------------------------------------------------------------------------------------------------------------------------------------------------------------------------------------------------------------------------------------------------------------------------------------------------|
| <p><b>Participant ID:</b> <input style="width: 40px; height: 20px;" type="text"/> <input style="width: 40px; height: 20px;" type="text"/> <input style="width: 40px; height: 20px;" type="text"/> <input style="width: 40px; height: 20px;" type="text"/></p> <p><b>Site ID:</b> <input style="width: 40px; height: 20px;" type="text"/> <input style="width: 40px; height: 20px;" type="text"/></p> <p><b>Community-based screening:</b> <input style="width: 30px; height: 20px;" type="checkbox"/></p> <p><b>Clinic-based screening:</b> <input style="width: 30px; height: 20px;" type="checkbox"/></p> <p><b>Interviewer Initials:</b> <input style="width: 40px; height: 20px;" type="text"/> <input style="width: 40px; height: 20px;" type="text"/> <input style="width: 40px; height: 20px;" type="text"/></p> | <p><b>Today's Date:</b></p> <p style="text-align: center;">Day                      Month                      Year</p> <p style="text-align: center;"><input style="width: 40px; height: 20px;" type="text"/> <input style="width: 40px; height: 20px;" type="text"/>      <input style="width: 40px; height: 20px;" type="text"/> <input style="width: 40px; height: 20px;" type="text"/>      <input style="width: 40px; height: 20px;" type="text"/> <input style="width: 40px; height: 20px;" type="text"/></p> <p><b>Time Interview Started:</b>                      <b>Time Interview Ended:</b></p> <p style="text-align: center;">Hour                      Minutes                      Hour                      Minutes</p> <p style="text-align: center;"><input style="width: 40px; height: 20px;" type="text"/> <input style="width: 40px; height: 20px;" type="text"/>      <input style="width: 40px; height: 20px;" type="text"/> <input style="width: 40px; height: 20px;" type="text"/>      <input style="width: 40px; height: 20px;" type="text"/> <input style="width: 40px; height: 20px;" type="text"/>      <input style="width: 40px; height: 20px;" type="text"/> <input style="width: 40px; height: 20px;" type="text"/></p> |
|-------------------------------------------------------------------------------------------------------------------------------------------------------------------------------------------------------------------------------------------------------------------------------------------------------------------------------------------------------------------------------------------------------------------------------------------------------------------------------------------------------------------------------------------------------------------------------------------------------------------------------------------------------------------------------------------------------------------------------------------------------------------------------------------------------------------------|------------------------------------------------------------------------------------------------------------------------------------------------------------------------------------------------------------------------------------------------------------------------------------------------------------------------------------------------------------------------------------------------------------------------------------------------------------------------------------------------------------------------------------------------------------------------------------------------------------------------------------------------------------------------------------------------------------------------------------------------------------------------------------------------------------------------------------------------------------------------------------------------------------------------------------------------------------------------------------------------------------------------------------------------------------------------------------------------------------------------------------------------------------------------------------------------------------------------------------------------------------|

|                                                                       |                                                             |                                                             |
|-----------------------------------------------------------------------|-------------------------------------------------------------|-------------------------------------------------------------|
|                                                                       | Yes                                                         | No                                                          |
| <b>Has the consent form been reviewed with the interviewee?</b>       | <input style="width: 30px; height: 20px;" type="checkbox"/> | <input style="width: 30px; height: 20px;" type="checkbox"/> |
| <b>Has the consent form been signed and dated by the interviewee?</b> | <input style="width: 30px; height: 20px;" type="checkbox"/> | <input style="width: 30px; height: 20px;" type="checkbox"/> |

**INTERVIEWER SAY:** *I want to thank you for taking the time to meet with me today. My name is \_\_\_\_\_ and I would like to talk to you about your experience participating in the HPV and Cervical Cancer Community Outreach Campaign and Education Module. First, I will ask you a series of questions that require short answers. The second part of the interview will be more like a conversation where I will ask for your thoughts and opinions about completing the educational session. As we discussed in the consent process, I'd like to tape record your answers during the interview if that is okay with you.*

### Section 1: Demographic Characteristics

| No.                                                                        | Questions                                                                     | Answer Choices                                                                                                                                                                                                                                                                                                                                                                                                                                                                                                                                                                                                                                                                                                                                                                                                                                                                                                                                                                                                                                                                                                                                                                                                                                                                                                                                                                                                                                                                                                                                                              |                                                                            |                                                                          |                                                                            |                                                                          |                                                                            |                                                                          |                                                                            |                                                                          |                                                                            |                                                                           |                                                                            |                                                                              |                                                                            |                                                                               |                                                                            |                                                                        |
|----------------------------------------------------------------------------|-------------------------------------------------------------------------------|-----------------------------------------------------------------------------------------------------------------------------------------------------------------------------------------------------------------------------------------------------------------------------------------------------------------------------------------------------------------------------------------------------------------------------------------------------------------------------------------------------------------------------------------------------------------------------------------------------------------------------------------------------------------------------------------------------------------------------------------------------------------------------------------------------------------------------------------------------------------------------------------------------------------------------------------------------------------------------------------------------------------------------------------------------------------------------------------------------------------------------------------------------------------------------------------------------------------------------------------------------------------------------------------------------------------------------------------------------------------------------------------------------------------------------------------------------------------------------------------------------------------------------------------------------------------------------|----------------------------------------------------------------------------|--------------------------------------------------------------------------|----------------------------------------------------------------------------|--------------------------------------------------------------------------|----------------------------------------------------------------------------|--------------------------------------------------------------------------|----------------------------------------------------------------------------|--------------------------------------------------------------------------|----------------------------------------------------------------------------|---------------------------------------------------------------------------|----------------------------------------------------------------------------|------------------------------------------------------------------------------|----------------------------------------------------------------------------|-------------------------------------------------------------------------------|----------------------------------------------------------------------------|------------------------------------------------------------------------|
| 101                                                                        | How old are you?                                                              | Age in years: <input style="width: 40px; height: 20px;" type="text"/> <input style="width: 40px; height: 20px;" type="text"/>                                                                                                                                                                                                                                                                                                                                                                                                                                                                                                                                                                                                                                                                                                                                                                                                                                                                                                                                                                                                                                                                                                                                                                                                                                                                                                                                                                                                                                               |                                                                            |                                                                          |                                                                            |                                                                          |                                                                            |                                                                          |                                                                            |                                                                          |                                                                            |                                                                           |                                                                            |                                                                              |                                                                            |                                                                               |                                                                            |                                                                        |
| 102                                                                        | What is the highest level of education you've completed?                      | <table style="width: 100%; border: none;"> <tr> <td style="width: 50%;">Standard 1 ... <input style="width: 20px; height: 15px;" type="checkbox"/></td> <td style="width: 50%;">Form 1 ..... <input style="width: 20px; height: 15px;" type="checkbox"/></td> </tr> <tr> <td>Standard 2 ... <input style="width: 20px; height: 15px;" type="checkbox"/></td> <td>Form 2 ..... <input style="width: 20px; height: 15px;" type="checkbox"/></td> </tr> <tr> <td>Standard 3 ... <input style="width: 20px; height: 15px;" type="checkbox"/></td> <td>Form 3 ..... <input style="width: 20px; height: 15px;" type="checkbox"/></td> </tr> <tr> <td>Standard 4 ... <input style="width: 20px; height: 15px;" type="checkbox"/></td> <td>Form 4 ..... <input style="width: 20px; height: 15px;" type="checkbox"/></td> </tr> <tr> <td>Standard 5 ... <input style="width: 20px; height: 15px;" type="checkbox"/></td> <td>College ..... <input style="width: 20px; height: 15px;" type="checkbox"/></td> </tr> <tr> <td>Standard 6 ... <input style="width: 20px; height: 15px;" type="checkbox"/></td> <td>University ..... <input style="width: 20px; height: 15px;" type="checkbox"/></td> </tr> <tr> <td>Standard 7 ... <input style="width: 20px; height: 15px;" type="checkbox"/></td> <td>Beyond University <input style="width: 20px; height: 15px;" type="checkbox"/></td> </tr> <tr> <td>Standard 8 ... <input style="width: 20px; height: 15px;" type="checkbox"/></td> <td>None ..... <input style="width: 20px; height: 15px;" type="checkbox"/></td> </tr> </table> | Standard 1 ... <input style="width: 20px; height: 15px;" type="checkbox"/> | Form 1 ..... <input style="width: 20px; height: 15px;" type="checkbox"/> | Standard 2 ... <input style="width: 20px; height: 15px;" type="checkbox"/> | Form 2 ..... <input style="width: 20px; height: 15px;" type="checkbox"/> | Standard 3 ... <input style="width: 20px; height: 15px;" type="checkbox"/> | Form 3 ..... <input style="width: 20px; height: 15px;" type="checkbox"/> | Standard 4 ... <input style="width: 20px; height: 15px;" type="checkbox"/> | Form 4 ..... <input style="width: 20px; height: 15px;" type="checkbox"/> | Standard 5 ... <input style="width: 20px; height: 15px;" type="checkbox"/> | College ..... <input style="width: 20px; height: 15px;" type="checkbox"/> | Standard 6 ... <input style="width: 20px; height: 15px;" type="checkbox"/> | University ..... <input style="width: 20px; height: 15px;" type="checkbox"/> | Standard 7 ... <input style="width: 20px; height: 15px;" type="checkbox"/> | Beyond University <input style="width: 20px; height: 15px;" type="checkbox"/> | Standard 8 ... <input style="width: 20px; height: 15px;" type="checkbox"/> | None ..... <input style="width: 20px; height: 15px;" type="checkbox"/> |
| Standard 1 ... <input style="width: 20px; height: 15px;" type="checkbox"/> | Form 1 ..... <input style="width: 20px; height: 15px;" type="checkbox"/>      |                                                                                                                                                                                                                                                                                                                                                                                                                                                                                                                                                                                                                                                                                                                                                                                                                                                                                                                                                                                                                                                                                                                                                                                                                                                                                                                                                                                                                                                                                                                                                                             |                                                                            |                                                                          |                                                                            |                                                                          |                                                                            |                                                                          |                                                                            |                                                                          |                                                                            |                                                                           |                                                                            |                                                                              |                                                                            |                                                                               |                                                                            |                                                                        |
| Standard 2 ... <input style="width: 20px; height: 15px;" type="checkbox"/> | Form 2 ..... <input style="width: 20px; height: 15px;" type="checkbox"/>      |                                                                                                                                                                                                                                                                                                                                                                                                                                                                                                                                                                                                                                                                                                                                                                                                                                                                                                                                                                                                                                                                                                                                                                                                                                                                                                                                                                                                                                                                                                                                                                             |                                                                            |                                                                          |                                                                            |                                                                          |                                                                            |                                                                          |                                                                            |                                                                          |                                                                            |                                                                           |                                                                            |                                                                              |                                                                            |                                                                               |                                                                            |                                                                        |
| Standard 3 ... <input style="width: 20px; height: 15px;" type="checkbox"/> | Form 3 ..... <input style="width: 20px; height: 15px;" type="checkbox"/>      |                                                                                                                                                                                                                                                                                                                                                                                                                                                                                                                                                                                                                                                                                                                                                                                                                                                                                                                                                                                                                                                                                                                                                                                                                                                                                                                                                                                                                                                                                                                                                                             |                                                                            |                                                                          |                                                                            |                                                                          |                                                                            |                                                                          |                                                                            |                                                                          |                                                                            |                                                                           |                                                                            |                                                                              |                                                                            |                                                                               |                                                                            |                                                                        |
| Standard 4 ... <input style="width: 20px; height: 15px;" type="checkbox"/> | Form 4 ..... <input style="width: 20px; height: 15px;" type="checkbox"/>      |                                                                                                                                                                                                                                                                                                                                                                                                                                                                                                                                                                                                                                                                                                                                                                                                                                                                                                                                                                                                                                                                                                                                                                                                                                                                                                                                                                                                                                                                                                                                                                             |                                                                            |                                                                          |                                                                            |                                                                          |                                                                            |                                                                          |                                                                            |                                                                          |                                                                            |                                                                           |                                                                            |                                                                              |                                                                            |                                                                               |                                                                            |                                                                        |
| Standard 5 ... <input style="width: 20px; height: 15px;" type="checkbox"/> | College ..... <input style="width: 20px; height: 15px;" type="checkbox"/>     |                                                                                                                                                                                                                                                                                                                                                                                                                                                                                                                                                                                                                                                                                                                                                                                                                                                                                                                                                                                                                                                                                                                                                                                                                                                                                                                                                                                                                                                                                                                                                                             |                                                                            |                                                                          |                                                                            |                                                                          |                                                                            |                                                                          |                                                                            |                                                                          |                                                                            |                                                                           |                                                                            |                                                                              |                                                                            |                                                                               |                                                                            |                                                                        |
| Standard 6 ... <input style="width: 20px; height: 15px;" type="checkbox"/> | University ..... <input style="width: 20px; height: 15px;" type="checkbox"/>  |                                                                                                                                                                                                                                                                                                                                                                                                                                                                                                                                                                                                                                                                                                                                                                                                                                                                                                                                                                                                                                                                                                                                                                                                                                                                                                                                                                                                                                                                                                                                                                             |                                                                            |                                                                          |                                                                            |                                                                          |                                                                            |                                                                          |                                                                            |                                                                          |                                                                            |                                                                           |                                                                            |                                                                              |                                                                            |                                                                               |                                                                            |                                                                        |
| Standard 7 ... <input style="width: 20px; height: 15px;" type="checkbox"/> | Beyond University <input style="width: 20px; height: 15px;" type="checkbox"/> |                                                                                                                                                                                                                                                                                                                                                                                                                                                                                                                                                                                                                                                                                                                                                                                                                                                                                                                                                                                                                                                                                                                                                                                                                                                                                                                                                                                                                                                                                                                                                                             |                                                                            |                                                                          |                                                                            |                                                                          |                                                                            |                                                                          |                                                                            |                                                                          |                                                                            |                                                                           |                                                                            |                                                                              |                                                                            |                                                                               |                                                                            |                                                                        |
| Standard 8 ... <input style="width: 20px; height: 15px;" type="checkbox"/> | None ..... <input style="width: 20px; height: 15px;" type="checkbox"/>        |                                                                                                                                                                                                                                                                                                                                                                                                                                                                                                                                                                                                                                                                                                                                                                                                                                                                                                                                                                                                                                                                                                                                                                                                                                                                                                                                                                                                                                                                                                                                                                             |                                                                            |                                                                          |                                                                            |                                                                          |                                                                            |                                                                          |                                                                            |                                                                          |                                                                            |                                                                           |                                                                            |                                                                              |                                                                            |                                                                               |                                                                            |                                                                        |

|                                              |                                                                                                                                 |                                                                                                                                                                                                                                                                                                                                                                                                                                                                                                                                                                                        |                                          |                                              |                                          |                                              |                                              |                                           |                                     |                                                  |                                        |  |
|----------------------------------------------|---------------------------------------------------------------------------------------------------------------------------------|----------------------------------------------------------------------------------------------------------------------------------------------------------------------------------------------------------------------------------------------------------------------------------------------------------------------------------------------------------------------------------------------------------------------------------------------------------------------------------------------------------------------------------------------------------------------------------------|------------------------------------------|----------------------------------------------|------------------------------------------|----------------------------------------------|----------------------------------------------|-------------------------------------------|-------------------------------------|--------------------------------------------------|----------------------------------------|--|
| 103                                          | What is your occupation?                                                                                                        | Professional/technical/managerial ..... <input type="checkbox"/><br>Domestic service ..... <input type="checkbox"/><br>Agriculture and Fishing ..... <input type="checkbox"/><br>Clerical ..... <input type="checkbox"/><br>Sales and services ..... <input type="checkbox"/><br>Skilled manual ..... <input type="checkbox"/><br>Unskilled manual ..... <input type="checkbox"/><br>None / Housewife ..... <input type="checkbox"/>                                                                                                                                                   |                                          |                                              |                                          |                                              |                                              |                                           |                                     |                                                  |                                        |  |
| 104                                          | How far is your home from the village center?                                                                                   | Distance in kilometres: <input type="text"/> <input type="text"/>                                                                                                                                                                                                                                                                                                                                                                                                                                                                                                                      |                                          |                                              |                                          |                                              |                                              |                                           |                                     |                                                  |                                        |  |
| 105                                          | How far is your home from the district hospital?                                                                                | Distance in kilometres: <input type="text"/> <input type="text"/>                                                                                                                                                                                                                                                                                                                                                                                                                                                                                                                      |                                          |                                              |                                          |                                              |                                              |                                           |                                     |                                                  |                                        |  |
| 106                                          | What is your relationship status?                                                                                               | Single ..... <input type="checkbox"/><br>Married/Partnered ..... <input type="checkbox"/><br>Separated ..... <input type="checkbox"/><br>Widowed/Divorced ..... <input type="checkbox"/>                                                                                                                                                                                                                                                                                                                                                                                               |                                          |                                              |                                          |                                              |                                              |                                           |                                     |                                                  |                                        |  |
| 107                                          | How many children do you currently have?                                                                                        | Number of children: <input type="text"/> <input type="text"/>                                                                                                                                                                                                                                                                                                                                                                                                                                                                                                                          |                                          |                                              |                                          |                                              |                                              |                                           |                                     |                                                  |                                        |  |
| 108                                          | Are you pregnant?                                                                                                               | Yes ..... <input type="checkbox"/><br>No ..... <input type="checkbox"/>                                                                                                                                                                                                                                                                                                                                                                                                                                                                                                                |                                          |                                              |                                          |                                              |                                              |                                           |                                     |                                                  |                                        |  |
| 109                                          | If pregnant, what is your estimated due date?<br><i>If not pregnant, skip to question #110.</i>                                 | <table style="width: 100%; text-align: center;"> <tr> <td>Day</td> <td>Month</td> <td>Year</td> </tr> <tr> <td><input type="text"/> <input type="text"/></td> <td><input type="text"/> <input type="text"/></td> <td><input type="text"/> <input type="text"/></td> </tr> </table>                                                                                                                                                                                                                                                                                                     | Day                                      | Month                                        | Year                                     | <input type="text"/> <input type="text"/>    | <input type="text"/> <input type="text"/>    | <input type="text"/> <input type="text"/> |                                     |                                                  |                                        |  |
| Day                                          | Month                                                                                                                           | Year                                                                                                                                                                                                                                                                                                                                                                                                                                                                                                                                                                                   |                                          |                                              |                                          |                                              |                                              |                                           |                                     |                                                  |                                        |  |
| <input type="text"/> <input type="text"/>    | <input type="text"/> <input type="text"/>                                                                                       | <input type="text"/> <input type="text"/>                                                                                                                                                                                                                                                                                                                                                                                                                                                                                                                                              |                                          |                                              |                                          |                                              |                                              |                                           |                                     |                                                  |                                        |  |
| 110                                          | Are you currently using a method of family planning?                                                                            | Yes ..... <input type="checkbox"/><br>No ..... <input type="checkbox"/>                                                                                                                                                                                                                                                                                                                                                                                                                                                                                                                |                                          |                                              |                                          |                                              |                                              |                                           |                                     |                                                  |                                        |  |
| 111                                          | If you are using FP, what method(s) are you using?<br>(Check all that apply).<br><i>If not using FP, skip to question #112.</i> | <table style="width: 100%;"> <tr> <td>Male condom ... <input type="checkbox"/></td> <td>Female condom ..... <input type="checkbox"/></td> </tr> <tr> <td>Injectable/Depo <input type="checkbox"/></td> <td>Sterilization ..... <input type="checkbox"/></td> </tr> <tr> <td>Birth control pills <input type="checkbox"/></td> <td>Abstinence ..... <input type="checkbox"/></td> </tr> <tr> <td>IUCD ..... <input type="checkbox"/></td> <td>Natural family planning <input type="checkbox"/></td> </tr> <tr> <td>Implant ..... <input type="checkbox"/></td> <td></td> </tr> </table> | Male condom ... <input type="checkbox"/> | Female condom ..... <input type="checkbox"/> | Injectable/Depo <input type="checkbox"/> | Sterilization ..... <input type="checkbox"/> | Birth control pills <input type="checkbox"/> | Abstinence ..... <input type="checkbox"/> | IUCD ..... <input type="checkbox"/> | Natural family planning <input type="checkbox"/> | Implant ..... <input type="checkbox"/> |  |
| Male condom ... <input type="checkbox"/>     | Female condom ..... <input type="checkbox"/>                                                                                    |                                                                                                                                                                                                                                                                                                                                                                                                                                                                                                                                                                                        |                                          |                                              |                                          |                                              |                                              |                                           |                                     |                                                  |                                        |  |
| Injectable/Depo <input type="checkbox"/>     | Sterilization ..... <input type="checkbox"/>                                                                                    |                                                                                                                                                                                                                                                                                                                                                                                                                                                                                                                                                                                        |                                          |                                              |                                          |                                              |                                              |                                           |                                     |                                                  |                                        |  |
| Birth control pills <input type="checkbox"/> | Abstinence ..... <input type="checkbox"/>                                                                                       |                                                                                                                                                                                                                                                                                                                                                                                                                                                                                                                                                                                        |                                          |                                              |                                          |                                              |                                              |                                           |                                     |                                                  |                                        |  |
| IUCD ..... <input type="checkbox"/>          | Natural family planning <input type="checkbox"/>                                                                                |                                                                                                                                                                                                                                                                                                                                                                                                                                                                                                                                                                                        |                                          |                                              |                                          |                                              |                                              |                                           |                                     |                                                  |                                        |  |
| Implant ..... <input type="checkbox"/>       |                                                                                                                                 |                                                                                                                                                                                                                                                                                                                                                                                                                                                                                                                                                                                        |                                          |                                              |                                          |                                              |                                              |                                           |                                     |                                                  |                                        |  |
| 112                                          | Have you previously been screened for cervical cancer?                                                                          | Yes ..... <input type="checkbox"/><br>No ..... <input type="checkbox"/>                                                                                                                                                                                                                                                                                                                                                                                                                                                                                                                |                                          |                                              |                                          |                                              |                                              |                                           |                                     |                                                  |                                        |  |

|     |                                                                                                                          |                                                                                                                                                                                                                                                                                                                                                                                                                                                                                                                                                                                                                                                      |
|-----|--------------------------------------------------------------------------------------------------------------------------|------------------------------------------------------------------------------------------------------------------------------------------------------------------------------------------------------------------------------------------------------------------------------------------------------------------------------------------------------------------------------------------------------------------------------------------------------------------------------------------------------------------------------------------------------------------------------------------------------------------------------------------------------|
| 113 | During what year were you screened for cervical cancer?<br><br><i>If not previously screened, skip to question #116.</i> | <div style="display: flex; justify-content: center; gap: 10px;"> <input style="width: 20px; height: 20px;" type="text"/> </div>                                                                                                                                                                                                                                                                                                                                              |
| 114 | What type of cervical cancer screening did you undergo?                                                                  | VIA/VILI ..... <input type="checkbox"/><br>Pap Smear ..... <input type="checkbox"/><br>HPV ..... <input type="checkbox"/><br>Unknown ..... <input type="checkbox"/>                                                                                                                                                                                                                                                                                                                                                                                                                                                                                  |
| 115 | What was the result of the cervical cancer screening test?                                                               | Positive ..... <input type="checkbox"/><br>Negative ..... <input type="checkbox"/><br>Unknown ..... <input type="checkbox"/>                                                                                                                                                                                                                                                                                                                                                                                                                                                                                                                         |
| 116 | Have you previously been treated for cervical cancer or precancer?                                                       | Yes ..... <input type="checkbox"/><br>No ..... <input type="checkbox"/>                                                                                                                                                                                                                                                                                                                                                                                                                                                                                                                                                                              |
| 117 | Please describe the type of treatment you received.<br><br><i>If not previously treated, skip to question #118.</i>      | <hr/> <hr/> <hr/>                                                                                                                                                                                                                                                                                                                                                                                                                                                                                                                                                                                                                                    |
| 118 | What was the date of your last HIV test?                                                                                 | <div style="display: flex; justify-content: center; gap: 20px; margin-bottom: 5px;"> <div style="text-align: center;">Day<br/><input style="width: 20px; height: 20px;" type="text"/> <input style="width: 20px; height: 20px;" type="text"/></div> <div style="text-align: center;">Month<br/><input style="width: 20px; height: 20px;" type="text"/> <input style="width: 20px; height: 20px;" type="text"/></div> <div style="text-align: center;">Year<br/><input style="width: 20px; height: 20px;" type="text"/> <input style="width: 20px; height: 20px;" type="text"/></div> </div> Never been tested for HIV ..... <input type="checkbox"/> |
| 119 | What was the result of your last HIV test?<br><br><i>If never tested, skip to question #122.</i>                         | Positive ..... <input type="checkbox"/><br>Negative ..... <input type="checkbox"/>                                                                                                                                                                                                                                                                                                                                                                                                                                                                                                                                                                   |
| 120 | If HIV positive, are you in HIV care?                                                                                    | Yes ..... <input type="checkbox"/><br>No ..... <input type="checkbox"/>                                                                                                                                                                                                                                                                                                                                                                                                                                                                                                                                                                              |
| 121 | Where are you receiving HIV care?<br><br><i>If not in HIV care, skip to question #122.</i>                               | <hr/> <hr/>                                                                                                                                                                                                                                                                                                                                                                                                                                                                                                                                                                                                                                          |
| 122 | Please describe any medical conditions that you have.                                                                    | <hr/> <hr/> <hr/> <hr/>                                                                                                                                                                                                                                                                                                                                                                                                                                                                                                                                                                                                                              |

| <b><u>Section 2: Quantitative Questions about the Outreach and Education Component</u></b> |                                                                                                                                         |                                                                                                                                                                                                                                                                                                                                 |
|--------------------------------------------------------------------------------------------|-----------------------------------------------------------------------------------------------------------------------------------------|---------------------------------------------------------------------------------------------------------------------------------------------------------------------------------------------------------------------------------------------------------------------------------------------------------------------------------|
| <b>No.</b>                                                                                 | <b>Question</b>                                                                                                                         | <b>Answer Choices</b>                                                                                                                                                                                                                                                                                                           |
| 201                                                                                        | Was information about cervical cancer screening and HPV-based testing provided in your community?                                       | Yes ..... <input type="checkbox"/><br>No ..... <input type="checkbox"/>                                                                                                                                                                                                                                                         |
| 202                                                                                        | If yes, where did you receive this information?<br><i>If no, skip to next section.</i>                                                  | Market ..... <input type="checkbox"/><br>Church ..... <input type="checkbox"/><br>Women's group meeting ..... <input type="checkbox"/><br>Fliers/posters ..... <input type="checkbox"/><br>Other ..... <input type="checkbox"/><br>_____                                                                                        |
| 203                                                                                        | If yes, had you heard of cervical cancer screening previously, or was this the first time?                                              | Heard about screening before ..... <input type="checkbox"/><br>First time hearing about screening ..... <input type="checkbox"/>                                                                                                                                                                                                |
| 204                                                                                        | Were you comfortable with the messages in the outreach and mobilization activities?                                                     | Yes ..... <input type="checkbox"/><br>No ..... <input type="checkbox"/>                                                                                                                                                                                                                                                         |
| 205                                                                                        | Were you comfortable with the people providing the outreach and mobilization activities?                                                | Yes ..... <input type="checkbox"/><br>No ..... <input type="checkbox"/>                                                                                                                                                                                                                                                         |
| 206                                                                                        | How did you feel about the amount of time outreach and mobilization activities took?                                                    | The amount of time was appropriate ..... <input type="checkbox"/><br>Too much time ..... <input type="checkbox"/><br>Not enough time ..... <input type="checkbox"/>                                                                                                                                                             |
| 207                                                                                        | During the outreach activities, what topics were covered?<br><b>INTERVIEWER:</b> <i>Do not read out the list. Check all that apply.</i> | Female anatomy ..... <input type="checkbox"/><br>Cervical cancer ..... <input type="checkbox"/><br>HPV ..... <input type="checkbox"/><br>Cervical cancer screening ..... <input type="checkbox"/><br>Cervical cancer treatment ..... <input type="checkbox"/><br>How to perform HPV self-testing ..... <input type="checkbox"/> |
| 208                                                                                        | At the end of the mobilization, did you receive information on how to access cervical cancer screening in your community?               | Yes ..... <input type="checkbox"/><br>No ..... <input type="checkbox"/>                                                                                                                                                                                                                                                         |
| 209                                                                                        | Do you plan to seek cervical cancer screening?                                                                                          | Yes ..... <input type="checkbox"/><br>No ..... <input type="checkbox"/>                                                                                                                                                                                                                                                         |

|                                                                                                                                                                                                                                                                                                                                                                                                                                                                                                                                                                                                                                                 |                                                                                                                                                                                                                                                 |             |
|-------------------------------------------------------------------------------------------------------------------------------------------------------------------------------------------------------------------------------------------------------------------------------------------------------------------------------------------------------------------------------------------------------------------------------------------------------------------------------------------------------------------------------------------------------------------------------------------------------------------------------------------------|-------------------------------------------------------------------------------------------------------------------------------------------------------------------------------------------------------------------------------------------------|-------------|
| 210                                                                                                                                                                                                                                                                                                                                                                                                                                                                                                                                                                                                                                             | <p>If you don't plan to seek cervical cancer screening, why not?</p> <p><i>If yes, skip to next section.</i></p>                                                                                                                                | <hr/> <hr/> |
| <p><b><u>Section 3: Open-ended Questions</u></b></p>                                                                                                                                                                                                                                                                                                                                                                                                                                                                                                                                                                                            |                                                                                                                                                                                                                                                 |             |
| <p><b>INTERVIEWER SAY:</b> <i>As I have mentioned, I will now ask you some questions about your thoughts and opinions about the cervical cancer outreach campaign and educational module. By "outreach" I mean the advertisements and announcements about both the educational module and screening availability. By "educational module" I mean the brief session that covered specific cervical cancer topics. There are no right or wrong answers to these questions – your views will be very helpful to us as we develop cervical cancer prevention interventions in the future. I will be recording our interview as we go along.</i></p> |                                                                                                                                                                                                                                                 |             |
| <b>No.</b>                                                                                                                                                                                                                                                                                                                                                                                                                                                                                                                                                                                                                                      | <b>Question</b>                                                                                                                                                                                                                                 |             |
| 401                                                                                                                                                                                                                                                                                                                                                                                                                                                                                                                                                                                                                                             | <p>Where do you feel would be the most effective place for outreach campaigns?</p> <p><i>Probe: Where would outreach campaigns reach the most women? Why?</i></p>                                                                               |             |
| 402                                                                                                                                                                                                                                                                                                                                                                                                                                                                                                                                                                                                                                             | <p>What kinds of outreach activities would be most effective?</p> <p><i>Probes: What activities would reach the highest number of women?</i></p> <p style="text-align: center;"><i>What activities would women find easy to understand?</i></p> |             |
| 403                                                                                                                                                                                                                                                                                                                                                                                                                                                                                                                                                                                                                                             | <p>What kinds of outreach activities would not be acceptable?</p> <p><i>Probes: What activities might make women uncomfortable?</i></p> <p style="text-align: center;"><i>What activities might offend women (or men)?</i></p>                  |             |
| 404                                                                                                                                                                                                                                                                                                                                                                                                                                                                                                                                                                                                                                             | <p>Have you previously heard of cervical cancer programs in your own or nearby communities, and if so, can you describe some of the outreach activities?</p>                                                                                    |             |
| 405                                                                                                                                                                                                                                                                                                                                                                                                                                                                                                                                                                                                                                             | <p>Do you believe it is important for outreach campaigns to also reach men? Why or why not?</p>                                                                                                                                                 |             |
| 406                                                                                                                                                                                                                                                                                                                                                                                                                                                                                                                                                                                                                                             | <p>What do you feel is the level of knowledge about cervical cancer prevention among those in your community?</p> <p><i>Probe: Among women, men, health care providers?</i></p>                                                                 |             |
| 407                                                                                                                                                                                                                                                                                                                                                                                                                                                                                                                                                                                                                                             | <p>How can cervical cancer education for women be improved?</p>                                                                                                                                                                                 |             |
| 408                                                                                                                                                                                                                                                                                                                                                                                                                                                                                                                                                                                                                                             | <p>What role does cervical cancer education play in a woman's decision to get screened?</p>                                                                                                                                                     |             |
| 409                                                                                                                                                                                                                                                                                                                                                                                                                                                                                                                                                                                                                                             | <p>Who do you feel would be most appropriate to conduct community outreach and to teach the education module?</p>                                                                                                                               |             |

|                                                                                                                                    |                                                                                                                                                                                                             |
|------------------------------------------------------------------------------------------------------------------------------------|-------------------------------------------------------------------------------------------------------------------------------------------------------------------------------------------------------------|
|                                                                                                                                    | <i>Probe: Is it important for outreach and education workers to be a certain gender, or to have medical training?</i>                                                                                       |
| 410                                                                                                                                | What settings do you think are most appropriate for a detailed education module on cervical cancer?<br><i>Probe: Is the education module appropriate for group settings like clinic bays/waiting areas?</i> |
| 413                                                                                                                                | Do you have any other thoughts about the outreach campaigns and education module that we haven't covered?                                                                                                   |
| <b>INTERVIEWER:</b> <i>Thank respondent for her time and assistance.</i><br><br><i>Return to front page and enter ending time.</i> |                                                                                                                                                                                                             |
| <b><u>Interviewer notes or observations:</u></b>                                                                                   |                                                                                                                                                                                                             |
